# Supplementary material for: Virologic Efficacy of Casirivimab and Imdevimab COVID-19 Antibody Combination in Outpatients With SARS-CoV-2 Infection: A Phase 2 Dose-Ranging Randomized Clinical Trial
Source: PubMed Central journal article supplement — JAMA Netw Open. 2022 Aug 15;5(8):e2225411. doi: 10.1001/jamanetworkopen.2022.25411 (PMC9379747; doi:10.1001/jamanetworkopen.2022.25411), 2022-08-15
Supplement: jamanetwopen-e2225411-s003.pdf [file jamanetwopen-e2225411-s003.pdf]

\*First name, last name, and suffix (if applicable) are required and will appear in PubMed.

| <b>*Group Name(s): The COVID-19 Phase 2 Dose-Ranging Study Team</b> |                   |                              |                  |                       |                                          |                                                         |                                                                                            |
|---------------------------------------------------------------------|-------------------|------------------------------|------------------|-----------------------|------------------------------------------|---------------------------------------------------------|--------------------------------------------------------------------------------------------|
| <b>*First Name and Middle Initial(s)</b>                            | <b>*Last Name</b> | <b>*Suffix (eg, Jr, III)</b> | Academic Degrees | Institution           | Location (city, state/province, country) | Role or Contribution, eg, chair, principal investigator | Group (if more than 1 Group listed in the byline) and/or Subgroup (eg, Steering Committee) |
| Dario                                                               | Altamirano        |                              |                  | AGA Clinical Trials   | Miami, FL                                | Study Site Investigator                                 |                                                                                            |
| Dickson                                                             | Ellington         |                              |                  | AGA Clinical Trials   | Miami, FL                                | Study Site Investigator                                 |                                                                                            |
| Najmuddin                                                           | Karimjee          |                              |                  | APD Clinical Research | Splendora, TX                            | Study Site Investigator                                 |                                                                                            |
| Munib                                                               | Daudjee           |                              |                  | APD Clinical Research | Splendora, TX                            | Study Site Investigator                                 |                                                                                            |
| Jessica                                                             | Laabs             |                              |                  | APD Clinical Research | Splendora, TX                            | Study Site Investigator                                 |                                                                                            |
| Karen                                                               | Marler            |                              |                  | APD Clinical Research | Splendora, TX                            | Study Site Investigator                                 |                                                                                            |
| Natalee                                                             | Calais            |                              |                  | APD Clinical Research | Splendora, TX                            | Study Site Investigator                                 |                                                                                            |
| Zachary                                                             | Sheppard          |                              |                  | APD Clinical Research | Splendora, TX                            | Study Site Investigator                                 |                                                                                            |
| Kristy                                                              | Carroll           |                              |                  | APD Clinical Research | Splendora, TX                            | Study Site Investigator                                 |                                                                                            |
| Anita                                                               | Kohli             |                              |                  | Arizona Liver Health  | Tucson, AZ                               | Study Site Investigator                                 |                                                                                            |
| Vicki                                                               | McIntyre          |                              |                  | Arizona Liver Health  | Tucson, AZ                               | Study Site Investigator                                 |                                                                                            |
| Yessica                                                             | Sachdeva          |                              |                  | Arizona Liver Health  | Tucson, AZ                               | Study Site Investigator                                 |                                                                                            |
| Ashley                                                              | Carney            |                              |                  | Arizona Liver Health  | Tucson, AZ                               | Study Site Investigator                                 |                                                                                            |
| Yessica                                                             | Sachdeva          |                              |                  | Arizona Liver Health  | Mesa, AZ                                 | Study Site Investigator                                 |                                                                                            |

## Supplemental Online Content: Nonauthor Collaborators

\*First name, last name, and suffix (if applicable) are required and will appear in PubMed.

| *First Name and Middle Initial(s) | *Last Name     | *Suffix (eg, Jr, III) | Academic Degrees | Institution               | Location (city, state/province, country) | Role or Contribution, eg, chair, principal investigator | Group (if more than 1 Group listed in the byline) and/or Subgroup (eg, Steering Committee) |
|-----------------------------------|----------------|-----------------------|------------------|---------------------------|------------------------------------------|---------------------------------------------------------|--------------------------------------------------------------------------------------------|
| Anita                             | Kohli          |                       |                  | Arizona Liver Health      | Mesa, AZ                                 | Study Site Investigator                                 |                                                                                            |
| Amanda                            | McFarland      |                       |                  | Arizona Liver Health      | Mesa, AZ                                 | Study Site Investigator                                 |                                                                                            |
| Dina                              | Gibson         |                       |                  | Arizona Liver Health      | Mesa, AZ                                 | Study Site Investigator                                 |                                                                                            |
| Victorine                         | Ekoko          |                       |                  | Arizona Liver Health      | Mesa, AZ                                 | Study Site Investigator                                 |                                                                                            |
| Kenneth                           | Kim            |                       |                  | Ark Clinical Research     | Long Beach, CA                           | Study Site Investigator                                 |                                                                                            |
| Jason                             | Ahn            |                       |                  | Ark Clinical Research     | Long Beach, CA                           | Study Site Investigator                                 |                                                                                            |
| Nayna                             | Paryani        |                       |                  | Ark Clinical Research     | Long Beach, CA                           | Study Site Investigator                                 |                                                                                            |
| Amber                             | Mottola        |                       |                  | Ark Clinical Research     | Long Beach, CA                           | Study Site Investigator                                 |                                                                                            |
| Eva                               | Day            |                       |                  | Ark Clinical Research     | Long Beach, CA                           | Study Site Investigator                                 |                                                                                            |
| Martha                            | Navarro        |                       |                  | Ark Clinical Research     | Long Beach, CA                           | Study Site Investigator                                 |                                                                                            |
| Apinya                            | Vutikullird    |                       |                  | Ark Clinical Research     | Long Beach, CA                           | Study Site Investigator                                 |                                                                                            |
| Lilia                             | Roque-Guerrero |                       |                  | Bio-Medical Research, LLC | Miami, FL                                | Study Site Investigator                                 |                                                                                            |
| Ana                               | Gomez Ramirez  |                       |                  | Bio-Medical Research, LLC | Miami, FL                                | Study Site Investigator                                 |                                                                                            |
| Javier                            | Capote         |                       |                  | Bio-Medical Research, LLC | Miami, FL                                | Study Site Investigator                                 |                                                                                            |
| Gisel                             | Paz            |                       |                  | Bio-Medical Research, LLC | Miami, FL                                | Study Site Investigator                                 |                                                                                            |

## Supplemental Online Content: Nonauthor Collaborators

\*First name, last name, and suffix (if applicable) are required and will appear in PubMed.

| *First Name and Middle Initial(s) | *Last Name | *Suffix (eg, Jr, III) | Academic Degrees | Institution                          | Location (city, state/province, country) | Role or Contribution, eg, chair, principal investigator | Group (if more than 1 Group listed in the byline) and/or Subgroup (eg, Steering Committee) |
|-----------------------------------|------------|-----------------------|------------------|--------------------------------------|------------------------------------------|---------------------------------------------------------|--------------------------------------------------------------------------------------------|
| Nancy                             | Patel      |                       |                  | Carolina Medical Research            | Clinton, SC                              | Study Site Investigator                                 |                                                                                            |
| Ravikumar                         | Patel      |                       |                  | Carolina Medical Research            | Clinton, SC                              | Study Site Investigator                                 |                                                                                            |
| Ryan                              | Sattar     |                       |                  | Carolina Medical Research            | Clinton, SC                              | Study Site Investigator                                 |                                                                                            |
| Michael                           | Seep       |                       |                  | Centex Studies                       | Lake Charles, LA                         | Study Site Investigator                                 |                                                                                            |
| Celeste                           | Brown      |                       |                  | Centex Studies                       | Lake Charles, LA                         | Study Site Investigator                                 |                                                                                            |
| Joshua                            | Whatley    |                       |                  | Centex Studies                       | Lake Charles, LA                         | Study Site Investigator                                 |                                                                                            |
| Dennis                            | Levinson   |                       |                  | Chicago Clinical Research Institute  | Downers Grove, IL                        | Study Site Investigator                                 |                                                                                            |
| Azazuddin                         | Ahmed      |                       |                  | Chicago Clinical Research Institute  | Downers Grove, IL                        | Study Site Investigator                                 |                                                                                            |
| Norman                            | James      |                       |                  | Chicago Clinical Research Institute  | Downers Grove, IL                        | Study Site Investigator                                 |                                                                                            |
| Saad                              | Alvi       |                       |                  | Chicago Clinical Research Institute  | Downers Grove, IL                        | Study Site Investigator                                 |                                                                                            |
| Ann                               | Kuehl      |                       |                  | Chicago Clinical Research Institute  | Downers Grove, IL                        | Study Site Investigator                                 |                                                                                            |
| Robinson                          | Koilpillai |                       |                  | Clinical Research of Central Florida | Winter Haven, FL                         | Study Site Investigator                                 |                                                                                            |
| Stephanie                         | Cassady    |                       |                  | Clinical Research of Central Florida | Winter Haven, FL                         | Study Site Investigator                                 |                                                                                            |
| Jennifer                          | Cox        |                       |                  | Clinical Research of Central Florida | Winter Haven, FL                         | Study Site Investigator                                 |                                                                                            |
| Eduardo                           | Torres     |                       |                  | Clinical Research of Central Florida | Winter Haven, FL                         | Study Site Investigator                                 |                                                                                            |

## Supplemental Online Content: Nonauthor Collaborators

\*First name, last name, and suffix (if applicable) are required and will appear in PubMed.

| *First Name and Middle Initial(s) | *Last Name   | *Suffix (eg, Jr, III) | Academic Degrees | Institution                             | Location (city, state/province, country) | Role or Contribution, eg, chair, principal investigator | Group (if more than 1 Group listed in the byline) and/or Subgroup (eg, Steering Committee) |
|-----------------------------------|--------------|-----------------------|------------------|-----------------------------------------|------------------------------------------|---------------------------------------------------------|--------------------------------------------------------------------------------------------|
| Michael                           | Winnie       |                       |                  | Crossroads Clinical Research            | Corpus Christi, TX                       | Study Site Investigator                                 |                                                                                            |
| Omesh                             | Verma        |                       |                  | Crossroads Clinical Research            | Corpus Christi, TX                       | Study Site Investigator                                 |                                                                                            |
| Richard                           | Leggett      |                       |                  | Crossroads Clinical Research            | Corpus Christi, TX                       | Study Site Investigator                                 |                                                                                            |
| Ramon                             | Reyes        |                       |                  | DM Clinical Research/BFHC Research      | San Antonio, TX                          | Study Site Investigator                                 |                                                                                            |
| Keith                             | Beck         |                       |                  | DM Clinical Research/BFHC Research      | San Antonio, TX                          | Study Site Investigator                                 |                                                                                            |
| Brian                             | Poliquin     |                       |                  | DM Clinical Research/BFHC Research      | San Antonio, TX                          | Study Site Investigator                                 |                                                                                            |
| Murtaza                           | Mussaji      |                       |                  | DM Clinical Research/LinQ Research, LLC | Pearland, TX                             | Study Site Investigator                                 |                                                                                            |
| Jignesh                           | Shah         |                       |                  | DM Clinical Research/LinQ Research, LLC | Pearland, TX                             | Study Site Investigator                                 |                                                                                            |
| John                              | Eppensteiner |                       |                  | Duke Clinical Research                  | Durham, NC                               | Study Site Investigator                                 |                                                                                            |
| Alexander                         | Limkakeng    |                       |                  | Duke Clinical Research                  | Durham, NC                               | Study Site Investigator                                 |                                                                                            |
| Samuel                            | Francis      |                       |                  | Duke Clinical Research                  | Durham, NC                               | Study Site Investigator                                 |                                                                                            |
| Haresh                            | Boghara      |                       |                  | Epic Medical Research                   | Red Oak, TX                              | Study Site Investigator                                 |                                                                                            |
| Sunny                             | Patel        |                       |                  | Epic Medical Research                   | Red Oak, TX                              | Study Site Investigator                                 |                                                                                            |
| Bari                              | Eichelbaum   |                       |                  | Epic Medical Research                   | Red Oak, TX                              | Study Site Investigator                                 |                                                                                            |
| Duane                             | Anderson     |                       |                  | Excel Clinical Research                 | Las Vegas, NV                            | Study Site Investigator                                 |                                                                                            |

Supplemental Online Content: Nonauthor Collaborators

\*First name, last name, and suffix (if applicable) are required and will appear in PubMed.

| *First Name and Middle Initial(s) | *Last Name | *Suffix (eg, Jr, III) | Academic Degrees | Institution                            | Location (city, state/province, country) | Role or Contribution, eg, chair, principal investigator | Group (if more than 1 Group listed in the byline) and/or Subgroup (eg, Steering Committee) |
|-----------------------------------|------------|-----------------------|------------------|----------------------------------------|------------------------------------------|---------------------------------------------------------|--------------------------------------------------------------------------------------------|
| Sean                              | Su         |                       |                  | Excel Clinical Research                | Las Vegas, NV                            | Study Site Investigator                                 |                                                                                            |
| Alexander                         | Akhavan    |                       |                  | Excel Clinical Research                | Las Vegas, NV                            | Study Site Investigator                                 |                                                                                            |
| Joy                               | Venglik    |                       |                  | Excel Clinical Research                | Las Vegas, NV                            | Study Site Investigator                                 |                                                                                            |
| Diana                             | Kirby      |                       |                  | Excel Clinical Research                | Las Vegas, NV                            | Study Site Investigator                                 |                                                                                            |
| Crista                            | Fedora     |                       |                  | Excel Clinical Research                | Las Vegas, NV                            | Study Site Investigator                                 |                                                                                            |
| Faisal A.                         | Fakih      |                       |                  | Florida Pulmonary Research Institute   | Winter Park, FL                          | Study Site Investigator                                 |                                                                                            |
| Faisal M.                         | Fakih      |                       |                  | Florida Pulmonary Research Institute   | Winter Park, FL                          | Study Site Investigator                                 |                                                                                            |
| Fernando                          | Alvarado   |                       |                  | Florida Pulmonary Research Institute   | Winter Park, FL                          | Study Site Investigator                                 |                                                                                            |
| Daniel                            | Layish     |                       |                  | Florida Pulmonary Research Institute   | Winter Park, FL                          | Study Site Investigator                                 |                                                                                            |
| Jose                              | Diaz       |                       |                  | Florida Pulmonary Research Institute   | Winter Park, FL                          | Study Site Investigator                                 |                                                                                            |
| Andres                            | Perez      |                       |                  | Florida Pulmonary Research Institute   | Winter Park, FL                          | Study Site Investigator                                 |                                                                                            |
| Bhaktasharan                      | Patel      |                       |                  | Future Innovative Treatments, LLC      | Colorado Springs, CO                     | Study Site Investigator                                 |                                                                                            |
| Gary                              | Tarshis    |                       |                  | Future Innovative Treatments, LLC      | Colorado Springs, CO                     | Study Site Investigator                                 |                                                                                            |
| Roxana                            | Stoici     |                       |                  | Global Clinical Professionals Research | St Petersburg, FL                        | Study Site Investigator                                 |                                                                                            |
| Gualberto                         | Perez      |                       |                  | Global Clinical Professionals Research | St Petersburg, FL                        | Study Site Investigator                                 |                                                                                            |

Supplemental Online Content: Nonauthor Collaborators

\*First name, last name, and suffix (if applicable) are required and will appear in PubMed.

| *First Name and Middle Initial(s) | *Last Name  | *Suffix (eg, Jr, III) | Academic Degrees | Institution                            | Location (city, state/province, country) | Role or Contribution, eg, chair, principal investigator | Group (if more than 1 Group listed in the byline) and/or Subgroup (eg, Steering Committee) |
|-----------------------------------|-------------|-----------------------|------------------|----------------------------------------|------------------------------------------|---------------------------------------------------------|--------------------------------------------------------------------------------------------|
| Joseph                            | Pica        |                       |                  | Global Clinical Professionals Research | St Petersburg, FL                        | Study Site Investigator                                 |                                                                                            |
| Enrique                           | Villareal   |                       |                  | Global Clinical Professionals Research | St Petersburg, FL                        | Study Site Investigator                                 |                                                                                            |
| Farbod                            | Raiszadeh   |                       |                  | Harlem Hospital Center – NYCHHC        | Harlem, NY                               | Study Site Investigator                                 |                                                                                            |
| Sharon                            | Mannheimer  |                       |                  | Harlem Hospital Center – NYCHHC        | Harlem, NY                               | Study Site Investigator                                 |                                                                                            |
| Khaing T.                         | Myint       |                       |                  | Harlem Hospital Center – NYCHHC        | Harlem, NY                               | Study Site Investigator                                 |                                                                                            |
| Lovelyamma                        | Varghese    |                       |                  | Harlem Hospital Center – NYCHHC        | Harlem, NY                               | Study Site Investigator                                 |                                                                                            |
| Anya T.                           | Weerasinghe |                       |                  | Harlem Hospital Center – NYCHHC        | Harlem, NY                               | Study Site Investigator                                 |                                                                                            |
| Raji                              | Ayinla      |                       |                  | Harlem Hospital Center – NYCHHC        | Harlem, NY                               | Study Site Investigator                                 |                                                                                            |
| Hussein                           | Assallum    |                       |                  | Harlem Hospital Center – NYCHHC        | Harlem, NY                               | Study Site Investigator                                 |                                                                                            |
| Akari                             | Kyaw        |                       |                  | Harlem Hospital Center – NYCHHC        | Harlem, NY                               | Study Site Investigator                                 |                                                                                            |
| Simona                            | Bratu       |                       |                  | Harlem Hospital Center – NYCHHC        | Harlem, NY                               | Study Site Investigator                                 |                                                                                            |
| Robin                             | O'Reilly    |                       |                  | Harlem Hospital Center – NYCHHC        | Harlem, NY                               | Study Site Investigator                                 |                                                                                            |
| Donna                             | Dowie       |                       |                  | Harlem Hospital Center – NYCHHC        | Harlem, NY                               | Study Site Investigator                                 |                                                                                            |
| Karina                            | Chan        |                       |                  | Harlem Hospital Center – NYCHHC        | Harlem, NY                               | Study Site Investigator                                 |                                                                                            |
| Suraj                             | Saggar      |                       |                  | Holy Name Medical Center               | Teaneck, NJ                              | Study Site Investigator                                 |                                                                                            |

## Supplemental Online Content: Nonauthor Collaborators

\*First name, last name, and suffix (if applicable) are required and will appear in PubMed.

| *First Name and Middle Initial(s) | *Last Name      | *Suffix (eg, Jr, III) | Academic Degrees | Institution                | Location (city, state/province, country) | Role or Contribution, eg, chair, principal investigator | Group (if more than 1 Group listed in the byline) and/or Subgroup (eg, Steering Committee) |
|-----------------------------------|-----------------|-----------------------|------------------|----------------------------|------------------------------------------|---------------------------------------------------------|--------------------------------------------------------------------------------------------|
| Thomas                            | Birch           |                       |                  | Holy Name Medical Center   | Teaneck, NJ                              | Study Site Investigator                                 |                                                                                            |
| Benjamin                          | De La Rosa      |                       |                  | Holy Name Medical Center   | Teaneck, NJ                              | Study Site Investigator                                 |                                                                                            |
| Karyna                            | Neyra           |                       |                  | Holy Name Medical Center   | Teaneck, NJ                              | Study Site Investigator                                 |                                                                                            |
| Erina                             | Kunwar          |                       |                  | Holy Name Medical Center   | Teaneck, NJ                              | Study Site Investigator                                 |                                                                                            |
| Hessam                            | Aazami          |                       |                  | Hope Clinical Research     | Canoga Park, CA                          | Study Site Investigator                                 |                                                                                            |
| Cheryl                            | Bland           |                       |                  | Hope Clinical Research     | Canoga Park, CA                          | Study Site Investigator                                 |                                                                                            |
| Mary Michelle                     | Nolasco         |                       |                  | Hope Clinical Research     | Canoga Park, CA                          | Study Site Investigator                                 |                                                                                            |
| Howard                            | Huang           |                       |                  | Houston Methodist Hospital | Houston, TX                              | Study Site Investigator                                 |                                                                                            |
| Jihad                             | Georges Youssef |                       |                  | Houston Methodist Hospital | Houston, TX                              | Study Site Investigator                                 |                                                                                            |
| Simon                             | Yau             |                       |                  | Houston Methodist Hospital | Houston, TX                              | Study Site Investigator                                 |                                                                                            |
| Ahmad                             | Goodarzi        |                       |                  | Houston Methodist Hospital | Houston, TX                              | Study Site Investigator                                 |                                                                                            |
| Mukhtar                           | Al-Saadi        |                       |                  | Houston Methodist Hospital | Houston, TX                              | Study Site Investigator                                 |                                                                                            |
| Faisal                            | Zahiruddin      |                       |                  | Houston Methodist Hospital | Houston, TX                              | Study Site Investigator                                 |                                                                                            |
| Jeffrey                           | Kingsley        |                       |                  | IACT Health                | Columbus, GA                             | Study Site Investigator                                 |                                                                                            |
| April                             | Pixler          |                       |                  | IACT Health                | Columbus, GA                             | Study Site Investigator                                 |                                                                                            |

## Supplemental Online Content: Nonauthor Collaborators

\*First name, last name, and suffix (if applicable) are required and will appear in PubMed.

| *First Name and Middle Initial(s) | *Last Name | *Suffix (eg, Jr, III) | Academic Degrees | Institution                           | Location (city, state/province, country) | Role or Contribution, eg, chair, principal investigator | Group (if more than 1 Group listed in the byline) and/or Subgroup (eg, Steering Committee) |
|-----------------------------------|------------|-----------------------|------------------|---------------------------------------|------------------------------------------|---------------------------------------------------------|--------------------------------------------------------------------------------------------|
| Christopher                       | deFilippi  |                       |                  | Innova Health Care Services (INOVA F  | Falls Church, VA                         | Study Site Investigator                                 |                                                                                            |
| Christopher                       | King       |                       |                  | Innova Health Care Services (INOVA F  | Falls Church, VA                         | Study Site Investigator                                 |                                                                                            |
| Lindsay                           | Clevenger  |                       |                  | Innova Health Care Services (INOVA F  | Falls Church, VA                         | Study Site Investigator                                 |                                                                                            |
| Richard                           | Wilkerson  |                       |                  | Maryland School of Medicine           | Baltimore, MD                            | Study Site Investigator                                 |                                                                                            |
| Shivakumar                        | Narayanan  |                       |                  | Maryland School of Medicine           | Baltimore, MD                            | Study Site Investigator                                 |                                                                                            |
| Joel                              | Chua       |                       |                  | Maryland School of Medicine           | Baltimore, MD                            | Study Site Investigator                                 |                                                                                            |
| Jennifer                          | Husson     |                       |                  | Maryland School of Medicine           | Baltimore, MD                            | Study Site Investigator                                 |                                                                                            |
| John                              | Baddley    |                       |                  | Maryland School of Medicine           | Baltimore, MD                            | Study Site Investigator                                 |                                                                                            |
| Rajasekaran                       | Annamalai  |                       |                  | Mercury Clinical Research             | Houston, TX                              | Study Site Investigator                                 |                                                                                            |
| Huy                               | Nguyen     |                       |                  | Mercury Clinical Research             | Houston, TX                              | Study Site Investigator                                 |                                                                                            |
| Nizar                             | Nayani     |                       |                  | Mercury Clinical Research             | Houston, TX                              | Study Site Investigator                                 |                                                                                            |
| Mahalakshmi                       | Ramchandra |                       |                  | Mercury Clinical Research             | Houston, TX                              | Study Site Investigator                                 |                                                                                            |
| Thomas                            | Herchline  |                       |                  | Miami Valley Hospital                 | Dayton, OH                               | Study Site Investigator                                 |                                                                                            |
| Steve                             | Burdette   |                       |                  | Miami Valley Hospital                 | Dayton, OH                               | Study Site Investigator                                 |                                                                                            |
| Godson                            | Oguchi     |                       |                  | Midland Florida Clinical Research Cer | Deland, FL                               | Study Site Investigator                                 |                                                                                            |

## Supplemental Online Content: Nonauthor Collaborators

\*First name, last name, and suffix (if applicable) are required and will appear in PubMed.

| *First Name and Middle Initial(s) | *Last Name | *Suffix (eg, Jr, III) | Academic Degrees | Institution                           | Location (city, state/province, country) | Role or Contribution, eg, chair, principal investigator | Group (if more than 1 Group listed in the byline) and/or Subgroup (eg, Steering Committee) |
|-----------------------------------|------------|-----------------------|------------------|---------------------------------------|------------------------------------------|---------------------------------------------------------|--------------------------------------------------------------------------------------------|
| Judepatricks                      | Onyema     |                       |                  | Midland Florida Clinical Research Cer | Deland, FL                               | Study Site Investigator                                 |                                                                                            |
| Moti                              | Ramgopal   |                       |                  | Midway Immunology and Research C      | Fort Pierce, FL                          | Study Site Investigator                                 |                                                                                            |
| Brenda                            | Jacobs     |                       |                  | Midway Immunology and Research C      | Fort Pierce, FL                          | Study Site Investigator                                 |                                                                                            |
| Terence                           | Chang      |                       |                  | Next Level Urgent Care                | Houston, TX                              | Study Site Investigator                                 |                                                                                            |
| Robbyn                            | Traylor    |                       |                  | Next Level Urgent Care                | Houston, TX                              | Study Site Investigator                                 |                                                                                            |
| Lenee                             | Gordon     |                       |                  | Next Level Urgent Care                | Houston, TX                              | Study Site Investigator                                 |                                                                                            |
| John                              | McDivitt   |                       |                  | Next Level Urgent Care                | Houston, TX                              | Study Site Investigator                                 |                                                                                            |
| Lizette                           | Castro     |                       |                  | Next Level Urgent Care                | Houston, TX                              | Study Site Investigator                                 |                                                                                            |
| Lawrence                          | Sher       |                       |                  | Peninsula Research Associates         | Rolling Hills Estates, CA                | Study Site Investigator                                 |                                                                                            |
| Monica                            | Saad       |                       |                  | Peninsula Research Associates         | Rolling Hills Estates, CA                | Study Site Investigator                                 |                                                                                            |
| LeighAnn                          | Schmidt    |                       |                  | Peninsula Research Associates         | Rolling Hills Estates, CA                | Study Site Investigator                                 |                                                                                            |
| David                             | Brabham    |                       |                  | Pharma Tex Research, LLC              | Amarillo, TX                             | Study Site Investigator                                 |                                                                                            |
| Tarek                             | Naguib     |                       |                  | Pharma Tex Research, LLC              | Amarillo, TX                             | Study Site Investigator                                 |                                                                                            |
| Mark                              | Sigler     |                       |                  | Pharma Tex Research, LLC              | Amarillo, TX                             | Study Site Investigator                                 |                                                                                            |
| Jennifer                          | Killion    |                       |                  | PMG Research of McFarland Clinic      | Ames, IA                                 | Study Site Investigator                                 |                                                                                            |

## Supplemental Online Content: Nonauthor Collaborators

\*First name, last name, and suffix (if applicable) are required and will appear in PubMed.

| *First Name and Middle Initial(s) | *Last Name | *Suffix (eg, Jr, III) | Academic Degrees | Institution                          | Location (city, state/province, country) | Role or Contribution, eg, chair, principal investigator | Group (if more than 1 Group listed in the byline) and/or Subgroup (eg, Steering Committee) |
|-----------------------------------|------------|-----------------------|------------------|--------------------------------------|------------------------------------------|---------------------------------------------------------|--------------------------------------------------------------------------------------------|
| Rupal                             | Amin       |                       |                  | PMG Research of McFarland Clinic     | Ames, IA                                 | Study Site Investigator                                 |                                                                                            |
| Timothy                           | Lowry      |                       |                  | PMG Research of McFarland Clinic     | Ames, IA                                 | Study Site Investigator                                 |                                                                                            |
| Kevin                             | Cannon     |                       |                  | PMG Research of Wilmington           | Wilmington, NC                           | Study Site Investigator                                 |                                                                                            |
| Mesha                             | Chadwick   |                       |                  | PMG Research of Wilmington           | Wilmington, NC                           | Study Site Investigator                                 |                                                                                            |
| Trevan                            | Fischer    |                       |                  | Providence Saint John's Health Cente | Santa Monica, CA                         | Study Site Investigator                                 |                                                                                            |
| Terese                            | Hammond    |                       |                  | Providence Saint John's Health Cente | Santa Monica, CA                         | Study Site Investigator                                 |                                                                                            |
| Anmol                             | Rangoola   |                       |                  | Providence Saint John's Health Cente | Santa Monica, CA                         | Study Site Investigator                                 |                                                                                            |
| Oscar                             | Galvez     |                       |                  | Qway Research                        | Hialeah, FL                              | Study Site Investigator                                 |                                                                                            |
| Fausto                            | Castillo   |                       |                  | Qway Research                        | Hialeah, FL                              | Study Site Investigator                                 |                                                                                            |
| Edward                            | Cordasco   |                       |                  | Remington-Davis                      | Columbus, OH                             | Study Site Investigator                                 |                                                                                            |
| Brian                             | Zeno       |                       |                  | Remington-Davis                      | Columbus, OH                             | Study Site Investigator                                 |                                                                                            |
| Heather                           | Lee        |                       |                  | Remington-Davis                      | Columbus, OH                             | Study Site Investigator                                 |                                                                                            |
| Peter                             | Ruane      |                       |                  | Ruane Clinical Research Group        | Los Angeles, CA                          | Study Site Investigator                                 |                                                                                            |
| Peter                             | Wolfe      |                       |                  | Ruane Clinical Research Group        | Los Angeles, CA                          | Study Site Investigator                                 |                                                                                            |
| Kenny                             | Trinidad   |                       |                  | Ruane Clinical Research Group        | Los Angeles, CA                          | Study Site Investigator                                 |                                                                                            |

## Supplemental Online Content: Nonauthor Collaborators

\*First name, last name, and suffix (if applicable) are required and will appear in PubMed.

| *First Name and Middle Initial(s) | *Last Name | *Suffix (eg, Jr, III) | Academic Degrees | Institution                        | Location (city, state/province, country) | Role or Contribution, eg, chair, principal investigator | Group (if more than 1 Group listed in the byline) and/or Subgroup (eg, Steering Committee) |
|-----------------------------------|------------|-----------------------|------------------|------------------------------------|------------------------------------------|---------------------------------------------------------|--------------------------------------------------------------------------------------------|
| Isaac                             | Berlin     |                       |                  | Ruane Clinical Research Group      | Los Angeles, CA                          | Study Site Investigator                                 |                                                                                            |
| Mark                              | Savant     |                       |                  | San Francisco Research Institute   | San Francisco, CA                        | Study Site Investigator                                 |                                                                                            |
| Edna                              | Yee        |                       |                  | San Francisco Research Institute   | San Francisco, CA                        | Study Site Investigator                                 |                                                                                            |
| Alan                              | Skolnick   |                       |                  | SignatureCare Emergency Center – T | Houston, TX                              | Study Site Investigator                                 |                                                                                            |
| Harold                            | Minkowitz  |                       |                  | SignatureCare Emergency Center – T | Houston, TX                              | Study Site Investigator                                 |                                                                                            |
| David                             | Leiman     |                       |                  | SignatureCare Emergency Center – T | Houston, TX                              | Study Site Investigator                                 |                                                                                            |
| Upinder                           | Singh      |                       |                  | Stanford University                | Palo Alto, CA                            | Study Site Investigator                                 |                                                                                            |
| Yvonne                            | Maldonado  |                       |                  | Stanford University                | Palo Alto, CA                            | Study Site Investigator                                 |                                                                                            |
| Jason                             | Andrews    |                       |                  | Stanford University                | Palo Alto, CA                            | Study Site Investigator                                 |                                                                                            |
| Chaitan                           | Khosla     |                       |                  | Stanford University                | Palo Alto, CA                            | Study Site Investigator                                 |                                                                                            |
| Hector                            | Bonilla    |                       |                  | Stanford University                | Palo Alto, CA                            | Study Site Investigator                                 |                                                                                            |
| Esteban                           | Olivera    |                       |                  | Tandem Clinical Research           | Maitland, FL                             | Study Site Investigator                                 |                                                                                            |
| Mayra                             | Abreu      |                       |                  | Tandem Clinical Research           | Maitland, FL                             | Study Site Investigator                                 |                                                                                            |
| Adil                              | Fatakia    |                       |                  | Tandem Clinical Research           | Marrero, LA                              | Study Site Investigator                                 |                                                                                            |
| Marissa                           | Miller     |                       |                  | Tandem Clinical Research           | Marrero, LA                              | Study Site Investigator                                 |                                                                                            |

## Supplemental Online Content: Nonauthor Collaborators

\*First name, last name, and suffix (if applicable) are required and will appear in PubMed.

| *First Name and Middle Initial(s) | *Last Name        | *Suffix (eg, Jr, III) | Academic Degrees | Institution                         | Location (city, state/province, country) | Role or Contribution, eg, chair, principal investigator | Group (if more than 1 Group listed in the byline) and/or Subgroup (eg, Steering Committee) |
|-----------------------------------|-------------------|-----------------------|------------------|-------------------------------------|------------------------------------------|---------------------------------------------------------|--------------------------------------------------------------------------------------------|
| Kristen                           | Clinton           |                       |                  | Tandem Clinical Research            | Marrero, LA                              | Study Site Investigator                                 |                                                                                            |
| Gary                              | Reiss             |                       |                  | Tandem Clinical Research            | Marrero, LA                              | Study Site Investigator                                 |                                                                                            |
| Olayemi                           | Osiyemi           |                       |                  | Triple O Research Institute PA      | West Palm Beach, FL                      | Study Site Investigator                                 |                                                                                            |
| Jose A.                           | Menajovsky-Chaves |                       |                  | Triple O Research Institute PA      | West Palm Beach, FL                      | Study Site Investigator                                 |                                                                                            |
| Christina                         | Campbell          |                       |                  | Triple O Research Institute PA      | West Palm Beach, FL                      | Study Site Investigator                                 |                                                                                            |
| Stephanie                         | Martinez          |                       |                  | Triple O Research Institute PA      | West Palm Beach, FL                      | Study Site Investigator                                 |                                                                                            |
| Gerard                            | Acloque           |                       |                  | Universal Medical and Research Cent | Miami, FL                                | Study Site Investigator                                 |                                                                                            |
| Agustin                           | Martinez          |                       |                  | Universal Medical and Research Cent | Miami, FL                                | Study Site Investigator                                 |                                                                                            |
| Kami                              | Kim               |                       |                  | University of South Florida         | Tampa, FL                                | Study Site Investigator                                 |                                                                                            |
| Seetha                            | Lakshmi           |                       |                  | University of South Florida         | Tampa, FL                                | Study Site Investigator                                 |                                                                                            |
| Asa                               | Oxner             |                       |                  | University of South Florida         | Tampa, FL                                | Study Site Investigator                                 |                                                                                            |
| Jason                             | Wilson            |                       |                  | University of South Florida         | Tampa, FL                                | Study Site Investigator                                 |                                                                                            |
| Lucy                              | Guerra            |                       |                  | University of South Florida         | Tampa, FL                                | Study Site Investigator                                 |                                                                                            |
| Tiffany                           | Vasey             |                       |                  | University of South Florida         | Tampa, FL                                | Study Site Investigator                                 |                                                                                            |
| Susannah                          | Hall              |                       |                  | University of South Florida         | Tampa, FL                                | Study Site Investigator                                 |                                                                                            |

Supplemental Online Content: Nonauthor Collaborators

\*First name, last name, and suffix (if applicable) are required and will appear in PubMed.

| *First Name and Middle Initial(s) | *Last Name | *Suffix (eg, Jr, III) | Academic Degrees | Institution                       | Location (city, state/province, country) | Role or Contribution, eg, chair, principal investigator | Group (if more than 1 Group listed in the byline) and/or Subgroup (eg, Steering Committee) |
|-----------------------------------|------------|-----------------------|------------------|-----------------------------------|------------------------------------------|---------------------------------------------------------|--------------------------------------------------------------------------------------------|
| Joseph                            | Bocchini   |                       |                  | Willis-Knighton Physician Network | Shreveport, LA                           | Study Site Investigator                                 |                                                                                            |
| Clint                             | Wilson     |                       |                  | Willis-Knighton Physician Network | Shreveport, LA                           | Study Site Investigator                                 |                                                                                            |
| Kathryn                           | Adams      |                       |                  | Regeneron Pharmaceuticals, Inc    | Tarrytown, NY, USA                       | Regeneron Study Team Member                             |                                                                                            |
| Dawn                              | Applegate  |                       |                  | Regeneron Pharmaceuticals, Inc    | Tarrytown, NY, USA                       | Regeneron Study Team Member                             |                                                                                            |
| Dhanalakshmi                      | Barron     |                       |                  | Regeneron Pharmaceuticals, Inc    | Tarrytown, NY, USA                       | Regeneron Study Team Member                             |                                                                                            |
| Mary                              | Basilious  |                       |                  | Regeneron Pharmaceuticals, Inc    | Tarrytown, NY, USA                       | Regeneron Study Team Member                             |                                                                                            |
| Travis                            | Bernardo   |                       |                  | Regeneron Pharmaceuticals, Inc    | Tarrytown, NY, USA                       | Regeneron Study Team Member                             |                                                                                            |
| Eleonora                          | Bianchi    |                       |                  | Regeneron Pharmaceuticals, Inc    | Tarrytown, NY, USA                       | Regeneron Study Team Member                             |                                                                                            |
| Dona                              | Bianco     |                       |                  | Regeneron Pharmaceuticals, Inc    | Tarrytown, NY, USA                       | Regeneron Study Team Member                             |                                                                                            |
| Manika                            | Bista      |                       |                  | Regeneron Pharmaceuticals, Inc    | Tarrytown, NY, USA                       | Regeneron Study Team Member                             |                                                                                            |
| Mandi                             | Blackmon   |                       |                  | Regeneron Pharmaceuticals, Inc    | Tarrytown, NY, USA                       | Regeneron Study Team Member                             |                                                                                            |
| Teresa                            | Blake      |                       |                  | Regeneron Pharmaceuticals, Inc    | Tarrytown, NY, USA                       | Regeneron Study Team Member                             |                                                                                            |
| Jessica                           | Boarder    |                       |                  | Regeneron Pharmaceuticals, Inc    | Tarrytown, NY, USA                       | Regeneron Study Team Member                             |                                                                                            |
| Lisa                              | Boersma    |                       |                  | Regeneron Pharmaceuticals, Inc    | Tarrytown, NY, USA                       | Regeneron Study Team Member                             |                                                                                            |
| Denise                            | Bonhomme   |                       |                  | Regeneron Pharmaceuticals, Inc    | Tarrytown, NY, USA                       | Regeneron Study Team Member                             |                                                                                            |

## Supplemental Online Content: Nonauthor Collaborators

\*First name, last name, and suffix (if applicable) are required and will appear in PubMed.

| *First Name and Middle Initial(s) | *Last Name  | *Suffix (eg, Jr, III) | Academic Degrees | Institution                    | Location (city, state/province, country) | Role or Contribution, eg, chair, principal investigator | Group (if more than 1 Group listed in the byline) and/or Subgroup (eg, Steering Committee) |
|-----------------------------------|-------------|-----------------------|------------------|--------------------------------|------------------------------------------|---------------------------------------------------------|--------------------------------------------------------------------------------------------|
| Peter                             | Boutros     |                       |                  | Regeneron Pharmaceuticals, Inc | Tarrytown, NY, USA                       | Regeneron Study Team Member                             |                                                                                            |
| Derrick                           | Bramble     |                       |                  | Regeneron Pharmaceuticals, Inc | Tarrytown, NY, USA                       | Regeneron Study Team Member                             |                                                                                            |
| Aurora                            | Breazna     |                       |                  | Regeneron Pharmaceuticals, Inc | Tarrytown, NY, USA                       | Regeneron Study Team Member                             |                                                                                            |
| Alison                            | Brown       |                       |                  | Regeneron Pharmaceuticals, Inc | Tarrytown, NY, USA                       | Regeneron Study Team Member                             |                                                                                            |
| Elizabeth                         | Bucknam     |                       |                  | Regeneron Pharmaceuticals, Inc | Tarrytown, NY, USA                       | Regeneron Study Team Member                             |                                                                                            |
| Tyrah                             | Chatman     |                       |                  | Regeneron Pharmaceuticals, Inc | Tarrytown, NY, USA                       | Regeneron Study Team Member                             |                                                                                            |
| Ravikanth                         | Chava       |                       |                  | Regeneron Pharmaceuticals, Inc | Tarrytown, NY, USA                       | Regeneron Study Team Member                             |                                                                                            |
| Donna                             | Cohen       |                       |                  | Regeneron Pharmaceuticals, Inc | Tarrytown, NY, USA                       | Regeneron Study Team Member                             |                                                                                            |
| Nikki                             | Covino      |                       |                  | Regeneron Pharmaceuticals, Inc | Tarrytown, NY, USA                       | Regeneron Study Team Member                             |                                                                                            |
| S. Balachandra                    | Dass        |                       |                  | Regeneron Pharmaceuticals, Inc | Tarrytown, NY, USA                       | Regeneron Study Team Member                             |                                                                                            |
| Amy                               | Davis       |                       |                  | Regeneron Pharmaceuticals, Inc | Tarrytown, NY, USA                       | Regeneron Study Team Member                             |                                                                                            |
| Jeanelle                          | De Villiers |                       |                  | Regeneron Pharmaceuticals, Inc | Tarrytown, NY, USA                       | Regeneron Study Team Member                             |                                                                                            |
| Sherrie                           | DeGuzman    |                       |                  | Regeneron Pharmaceuticals, Inc | Tarrytown, NY, USA                       | Regeneron Study Team Member                             |                                                                                            |
| Monica                            | DeYoung     |                       |                  | Regeneron Pharmaceuticals, Inc | Tarrytown, NY, USA                       | Regeneron Study Team Member                             |                                                                                            |
| Marc                              | Dickens     |                       |                  | Regeneron Pharmaceuticals, Inc | Tarrytown, NY, USA                       | Regeneron Study Team Member                             |                                                                                            |

## Supplemental Online Content: Nonauthor Collaborators

\*First name, last name, and suffix (if applicable) are required and will appear in PubMed.

| *First Name and Middle Initial(s) | *Last Name | *Suffix (eg, Jr, III) | Academic Degrees | Institution                    | Location (city, state/province, country) | Role or Contribution, eg, chair, principal investigator | Group (if more than 1 Group listed in the byline) and/or Subgroup (eg, Steering Committee) |
|-----------------------------------|------------|-----------------------|------------------|--------------------------------|------------------------------------------|---------------------------------------------------------|--------------------------------------------------------------------------------------------|
| Lacey                             | Douthat    |                       |                  | Regeneron Pharmaceuticals, Inc | Tarrytown, NY, USA                       | Regeneron Study Team Member                             |                                                                                            |
| Ajla                              | Dupljak    |                       |                  | Regeneron Pharmaceuticals, Inc | Tarrytown, NY, USA                       | Regeneron Study Team Member                             |                                                                                            |
| Adil                              | Fatakia    |                       |                  | Regeneron Pharmaceuticals, Inc | Tarrytown, NY, USA                       | Regeneron Study Team Member                             |                                                                                            |
| Joseph                            | Fitzgerald |                       |                  | Regeneron Pharmaceuticals, Inc | Tarrytown, NY, USA                       | Regeneron Study Team Member                             |                                                                                            |
| Kyle                              | Foster     |                       |                  | Regeneron Pharmaceuticals, Inc | Tarrytown, NY, USA                       | Regeneron Study Team Member                             |                                                                                            |
| Samit                             | Ganguly    |                       |                  | Regeneron Pharmaceuticals, Inc | Tarrytown, NY, USA                       | Regeneron Study Team Member                             |                                                                                            |
| Paul                              | Gao        |                       |                  | Regeneron Pharmaceuticals, Inc | Tarrytown, NY, USA                       | Regeneron Study Team Member                             |                                                                                            |
| Peter                             | Gasparini  |                       |                  | Regeneron Pharmaceuticals, Inc | Tarrytown, NY, USA                       | Regeneron Study Team Member                             |                                                                                            |
| Evelyn                            | Gasparino  |                       |                  | Regeneron Pharmaceuticals, Inc | Tarrytown, NY, USA                       | Regeneron Study Team Member                             |                                                                                            |
| Heath                             | Gonzalez   |                       |                  | Regeneron Pharmaceuticals, Inc | Tarrytown, NY, USA                       | Regeneron Study Team Member                             |                                                                                            |
| Ruchin                            | Gorawala   |                       |                  | Regeneron Pharmaceuticals, Inc | Tarrytown, NY, USA                       | Regeneron Study Team Member                             |                                                                                            |
| Daya                              | Gulabani   |                       |                  | Regeneron Pharmaceuticals, Inc | Tarrytown, NY, USA                       | Regeneron Study Team Member                             |                                                                                            |
| Mary                              | Hasinsky   |                       |                  | Regeneron Pharmaceuticals, Inc | Tarrytown, NY, USA                       | Regeneron Study Team Member                             |                                                                                            |
| Sheree                            | Hairston   |                       |                  | Regeneron Pharmaceuticals, Inc | Tarrytown, NY, USA                       | Regeneron Study Team Member                             |                                                                                            |
| Robert                            | Hamlin     |                       |                  | Regeneron Pharmaceuticals, Inc | Tarrytown, NY, USA                       | Regeneron Study Team Member                             |                                                                                            |

## Supplemental Online Content: Nonauthor Collaborators

\*First name, last name, and suffix (if applicable) are required and will appear in PubMed.

| *First Name and Middle Initial(s) | *Last Name | *Suffix (eg, Jr, III) | Academic Degrees | Institution                    | Location (city, state/province, country) | Role or Contribution, eg, chair, principal investigator | Group (if more than 1 Group listed in the byline) and/or Subgroup (eg, Steering Committee) |
|-----------------------------------|------------|-----------------------|------------------|--------------------------------|------------------------------------------|---------------------------------------------------------|--------------------------------------------------------------------------------------------|
| Dawlat                            | Hassan     |                       |                  | Regeneron Pharmaceuticals, Inc | Tarrytown, NY, USA                       | Regeneron Study Team Member                             |                                                                                            |
| Russell                           | Haywood    |                       |                  | Regeneron Pharmaceuticals, Inc | Tarrytown, NY, USA                       | Regeneron Study Team Member                             |                                                                                            |
| Brian                             | Head       |                       |                  | Regeneron Pharmaceuticals, Inc | Tarrytown, NY, USA                       | Regeneron Study Team Member                             |                                                                                            |
| Philippa                          | Hearld     |                       |                  | Regeneron Pharmaceuticals, Inc | Tarrytown, NY, USA                       | Regeneron Study Team Member                             |                                                                                            |
| Ingeborg                          | Heirman    |                       |                  | Regeneron Pharmaceuticals, Inc | Tarrytown, NY, USA                       | Regeneron Study Team Member                             |                                                                                            |
| Olga                              | Herrera    |                       |                  | Regeneron Pharmaceuticals, Inc | Tarrytown, NY, USA                       | Regeneron Study Team Member                             |                                                                                            |
| Romana                            | Hosain     |                       |                  | Regeneron Pharmaceuticals, Inc | Tarrytown, NY, USA                       | Regeneron Study Team Member                             |                                                                                            |
| Susan                             | Irvin      |                       |                  | Regeneron Pharmaceuticals, Inc | Tarrytown, NY, USA                       | Regeneron Study Team Member                             |                                                                                            |
| Ramya                             | Iyer       |                       |                  | Regeneron Pharmaceuticals, Inc | Tarrytown, NY, USA                       | Regeneron Study Team Member                             |                                                                                            |
| Lisa                              | Jackson    |                       |                  | Regeneron Pharmaceuticals, Inc | Tarrytown, NY, USA                       | Regeneron Study Team Member                             |                                                                                            |
| Rohit                             | Kamath     |                       |                  | Regeneron Pharmaceuticals, Inc | Tarrytown, NY, USA                       | Regeneron Study Team Member                             |                                                                                            |
| Helen                             | Kang       |                       |                  | Regeneron Pharmaceuticals, Inc | Tarrytown, NY, USA                       | Regeneron Study Team Member                             |                                                                                            |
| Denise                            | Kennedy    |                       |                  | Regeneron Pharmaceuticals, Inc | Tarrytown, NY, USA                       | Regeneron Study Team Member                             |                                                                                            |
| Elisa                             | King       |                       |                  | Regeneron Pharmaceuticals, Inc | Tarrytown, NY, USA                       | Regeneron Study Team Member                             |                                                                                            |
| Michael                           | Klingler   |                       |                  | Regeneron Pharmaceuticals, Inc | Tarrytown, NY, USA                       | Regeneron Study Team Member                             |                                                                                            |

## Supplemental Online Content: Nonauthor Collaborators

\*First name, last name, and suffix (if applicable) are required and will appear in PubMed.

| *First Name and Middle Initial(s) | *Last Name  | *Suffix (eg, Jr, III) | Academic Degrees | Institution                    | Location (city, state/province, country) | Role or Contribution, eg, chair, principal investigator | Group (if more than 1 Group listed in the byline) and/or Subgroup (eg, Steering Committee) |
|-----------------------------------|-------------|-----------------------|------------------|--------------------------------|------------------------------------------|---------------------------------------------------------|--------------------------------------------------------------------------------------------|
| Mi Young                          | Kwon        |                       |                  | Regeneron Pharmaceuticals, Inc | Tarrytown, NY, USA                       | Regeneron Study Team Member                             |                                                                                            |
| Carol                             | Lee         |                       |                  | Regeneron Pharmaceuticals, Inc | Tarrytown, NY, USA                       | Regeneron Study Team Member                             |                                                                                            |
| Maria                             | Lichtschein |                       |                  | Regeneron Pharmaceuticals, Inc | Tarrytown, NY, USA                       | Regeneron Study Team Member                             |                                                                                            |
| David                             | Liu         |                       |                  | Regeneron Pharmaceuticals, Inc | Tarrytown, NY, USA                       | Regeneron Study Team Member                             |                                                                                            |
| Kristy                            | Macci       |                       |                  | Regeneron Pharmaceuticals, Inc | Tarrytown, NY, USA                       | Regeneron Study Team Member                             |                                                                                            |
| Marco                             | Mancini     |                       |                  | Regeneron Pharmaceuticals, Inc | Tarrytown, NY, USA                       | Regeneron Study Team Member                             |                                                                                            |
| Nagaratna Reddy                   | Medapti     |                       |                  | Regeneron Pharmaceuticals, Inc | Tarrytown, NY, USA                       | Regeneron Study Team Member                             |                                                                                            |
| Nilang                            | Mehta       |                       |                  | Regeneron Pharmaceuticals, Inc | Tarrytown, NY, USA                       | Regeneron Study Team Member                             |                                                                                            |
| Colin                             | McDonald    |                       |                  | Regeneron Pharmaceuticals, Inc | Tarrytown, NY, USA                       | Regeneron Study Team Member                             |                                                                                            |
| Kristina                          | McGuire     |                       |                  | Regeneron Pharmaceuticals, Inc | Tarrytown, NY, USA                       | Regeneron Study Team Member                             |                                                                                            |
| Stephanie                         | Miller      |                       |                  | Regeneron Pharmaceuticals, Inc | Tarrytown, NY, USA                       | Regeneron Study Team Member                             |                                                                                            |
| Nkechi                            | Moghalu     |                       |                  | Regeneron Pharmaceuticals, Inc | Tarrytown, NY, USA                       | Regeneron Study Team Member                             |                                                                                            |
| Kosalai                           | Mohan       |                       |                  | Regeneron Pharmaceuticals, Inc | Tarrytown, NY, USA                       | Regeneron Study Team Member                             |                                                                                            |
| Nicholas                          | Moore       |                       |                  | Regeneron Pharmaceuticals, Inc | Tarrytown, NY, USA                       | Regeneron Study Team Member                             |                                                                                            |
| Emily                             | Nanna       |                       |                  | Regeneron Pharmaceuticals, Inc | Tarrytown, NY, USA                       | Regeneron Study Team Member                             |                                                                                            |

## Supplemental Online Content: Nonauthor Collaborators

\*First name, last name, and suffix (if applicable) are required and will appear in PubMed.

| *First Name and Middle Initial(s) | *Last Name      | *Suffix (eg, Jr, III) | Academic Degrees | Institution                    | Location (city, state/province, country) | Role or Contribution, eg, chair, principal investigator | Group (if more than 1 Group listed in the byline) and/or Subgroup (eg, Steering Committee) |
|-----------------------------------|-----------------|-----------------------|------------------|--------------------------------|------------------------------------------|---------------------------------------------------------|--------------------------------------------------------------------------------------------|
| Soraya                            | Nossoughi       |                       |                  | Regeneron Pharmaceuticals, Inc | Tarrytown, NY, USA                       | Regeneron Study Team Member                             |                                                                                            |
| Esther                            | Huffman O'Keefe |                       |                  | Regeneron Pharmaceuticals, Inc | Tarrytown, NY, USA                       | Regeneron Study Team Member                             |                                                                                            |
| Carrie                            | Papazian        |                       |                  | Regeneron Pharmaceuticals, Inc | Tarrytown, NY, USA                       | Regeneron Study Team Member                             |                                                                                            |
| Michael                           | Partridge       |                       |                  | Regeneron Pharmaceuticals, Inc | Tarrytown, NY, USA                       | Regeneron Study Team Member                             |                                                                                            |
| Christina                         | Perry           |                       |                  | Regeneron Pharmaceuticals, Inc | Tarrytown, NY, USA                       | Regeneron Study Team Member                             |                                                                                            |
| Cynthia                           | Plante          |                       |                  | Regeneron Pharmaceuticals, Inc | Tarrytown, NY, USA                       | Regeneron Study Team Member                             |                                                                                            |
| Kalpana                           | Pullakhandam    |                       |                  | Regeneron Pharmaceuticals, Inc | Tarrytown, NY, USA                       | Regeneron Study Team Member                             |                                                                                            |
| Emina                             | Radoncic        |                       |                  | Regeneron Pharmaceuticals, Inc | Tarrytown, NY, USA                       | Regeneron Study Team Member                             |                                                                                            |
| John                              | Rembis          |                       |                  | Regeneron Pharmaceuticals, Inc | Tarrytown, NY, USA                       | Regeneron Study Team Member                             |                                                                                            |
| Nelson                            | Rita            |                       |                  | Regeneron Pharmaceuticals, Inc | Tarrytown, NY, USA                       | Regeneron Study Team Member                             |                                                                                            |
| Mivianisse                        | Rodriguez       |                       |                  | Regeneron Pharmaceuticals, Inc | Tarrytown, NY, USA                       | Regeneron Study Team Member                             |                                                                                            |
| Neena                             | Sarkar          |                       |                  | Regeneron Pharmaceuticals, Inc | Tarrytown, NY, USA                       | Regeneron Study Team Member                             |                                                                                            |
| Viral                             | Seth            |                       |                  | Regeneron Pharmaceuticals, Inc | Tarrytown, NY, USA                       | Regeneron Study Team Member                             |                                                                                            |
| Ileana                            | Schirmer        |                       |                  | Regeneron Pharmaceuticals, Inc | Tarrytown, NY, USA                       | Regeneron Study Team Member                             |                                                                                            |
| Liyang                            | Shao            |                       |                  | Regeneron Pharmaceuticals, Inc | Tarrytown, NY, USA                       | Regeneron Study Team Member                             |                                                                                            |

## Supplemental Online Content: Nonauthor Collaborators

\*First name, last name, and suffix (if applicable) are required and will appear in PubMed.

| *First Name and Middle Initial(s) | *Last Name  | *Suffix (eg, Jr, III) | Academic Degrees | Institution                    | Location (city, state/province, country) | Role or Contribution, eg, chair, principal investigator | Group (if more than 1 Group listed in the byline) and/or Subgroup (eg, Steering Committee) |
|-----------------------------------|-------------|-----------------------|------------------|--------------------------------|------------------------------------------|---------------------------------------------------------|--------------------------------------------------------------------------------------------|
| Shelley Geila                     | Shapiro     |                       |                  | Regeneron Pharmaceuticals, Inc | Tarrytown, NY, USA                       | Regeneron Study Team Member                             |                                                                                            |
| Matthew                           | Silverman   |                       |                  | Regeneron Pharmaceuticals, Inc | Tarrytown, NY, USA                       | Regeneron Study Team Member                             |                                                                                            |
| Carmella                          | Simiele     |                       |                  | Regeneron Pharmaceuticals, Inc | Tarrytown, NY, USA                       | Regeneron Study Team Member                             |                                                                                            |
| Israel                            | Simonetti   |                       |                  | Regeneron Pharmaceuticals, Inc | Tarrytown, NY, USA                       | Regeneron Study Team Member                             |                                                                                            |
| Lisa                              | Sherpinsky  |                       |                  | Regeneron Pharmaceuticals, Inc | Tarrytown, NY, USA                       | Regeneron Study Team Member                             |                                                                                            |
| Anne                              | Smith       |                       |                  | Regeneron Pharmaceuticals, Inc | Tarrytown, NY, USA                       | Regeneron Study Team Member                             |                                                                                            |
| Jasmine                           | Smith       |                       |                  | Regeneron Pharmaceuticals, Inc | Tarrytown, NY, USA                       | Regeneron Study Team Member                             |                                                                                            |
| Pamela                            | Snodgrass   |                       |                  | Regeneron Pharmaceuticals, Inc | Tarrytown, NY, USA                       | Regeneron Study Team Member                             |                                                                                            |
| Michel                            | Tarabocchia |                       |                  | Regeneron Pharmaceuticals, Inc | Tarrytown, NY, USA                       | Regeneron Study Team Member                             |                                                                                            |
| Karen                             | Thabet      |                       |                  | Regeneron Pharmaceuticals, Inc | Tarrytown, NY, USA                       | Regeneron Study Team Member                             |                                                                                            |
| Yanmei                            | Tian        |                       |                  | Regeneron Pharmaceuticals, Inc | Tarrytown, NY, USA                       | Regeneron Study Team Member                             |                                                                                            |
| Caryn                             | Trbovic     |                       |                  | Regeneron Pharmaceuticals, Inc | Tarrytown, NY, USA                       | Regeneron Study Team Member                             |                                                                                            |
| Ngan                              | Trinh       |                       |                  | Regeneron Pharmaceuticals, Inc | Tarrytown, NY, USA                       | Regeneron Study Team Member                             |                                                                                            |
| Violet                            | Vincent     |                       |                  | Regeneron Pharmaceuticals, Inc | Tarrytown, NY, USA                       | Regeneron Study Team Member                             |                                                                                            |
| Jeff                              | Watts       |                       |                  | Regeneron Pharmaceuticals, Inc | Tarrytown, NY, USA                       | Regeneron Study Team Member                             |                                                                                            |

## Supplemental Online Content: Nonauthor Collaborators

\*First name, last name, and suffix (if applicable) are required and will appear in PubMed.

| *First Name and Middle Initial(s) | *Last Name | *Suffix (eg, Jr, III) | Academic Degrees | Institution                    | Location (city, state/province, country) | Role or Contribution, eg, chair, principal investigator | Group (if more than 1 Group listed in the byline) and/or Subgroup (eg, Steering Committee) |
|-----------------------------------|------------|-----------------------|------------------|--------------------------------|------------------------------------------|---------------------------------------------------------|--------------------------------------------------------------------------------------------|
| Jianguo (Victor)                  | Wei        |                       |                  | Regeneron Pharmaceuticals, Inc | Tarrytown, NY, USA                       | Regeneron Study Team Member                             |                                                                                            |
| Collen                            | Whetzel    |                       |                  | Regeneron Pharmaceuticals, Inc | Tarrytown, NY, USA                       | Regeneron Study Team Member                             |                                                                                            |
| Joseph                            | Wolken     |                       |                  | Regeneron Pharmaceuticals, Inc | Tarrytown, NY, USA                       | Regeneron Study Team Member                             |                                                                                            |
| Karen                             | Yau        |                       |                  | Regeneron Pharmaceuticals, Inc | Tarrytown, NY, USA                       | Regeneron Study Team Member                             |                                                                                            |
| Ori                               | Yellin     |                       |                  | Regeneron Pharmaceuticals, Inc | Tarrytown, NY, USA                       | Regeneron Study Team Member                             |                                                                                            |
| Jeannie                           | Yo         |                       |                  | Regeneron Pharmaceuticals, Inc | Tarrytown, NY, USA                       | Regeneron Study Team Member                             |                                                                                            |
| Yuming                            | Zhao       |                       |                  | Regeneron Pharmaceuticals, Inc | Tarrytown, NY, USA                       | Regeneron Study Team Member                             |                                                                                            |
| Bryan                             | Zhu        |                       |                  | Regeneron Pharmaceuticals, Inc | Tarrytown, NY, USA                       | Regeneron Study Team Member                             |                                                                                            |
