# Supplementary material for: Virologic Efficacy of Casirivimab and Imdevimab COVID-19 Antibody Combination in Outpatients With SARS-CoV-2 Infection: A Phase 2 Dose-Ranging Randomized Clinical Trial
Source: PubMed Central journal article supplement — JAMA Netw Open. 2022 Aug 15;5(8):e2225411. doi: 10.1001/jamanetworkopen.2022.25411 (PMC9379747; doi:10.1001/jamanetworkopen.2022.25411), 2022-08-15
Supplement: jamanetwopen-e2225411-s004.pdf [file jamanetwopen-e2225411-s004.pdf]

## Data Sharing Statement

Portal-Celhay. Virologic Efficacy of Casirivimab and Imdevimab COVID-19 Antibody Combination in Outpatients With SARS-CoV-2 Infection. *JAMA Netw Open*. Published August 15, 2022. doi:10.1001/jamanetworkopen.2022.25411

### Data

**Data available:** No
